# Supplementary material for: Silica nanoparticles induce hepatocyte ferroptosis and liver injury via ferritinophagy
Source: Royal Society of Chemistry journal article supplement (doi:10.1039/d2en00116k), 2022-01-01
Supplement: d2en00116k1.pdf [file d2en00116k1.pdf]

## **Silica nanoparticles induce hepatocytes ferroptosis and liver injury via ferritinophagy**

Qingqing Liang<sup>a, b, c</sup>, Yuexiao Ma<sup>a, b</sup>, Fenghong Wang<sup>a, b</sup>, Mengqi Sun<sup>a, b</sup>, Lisen Lin<sup>a, b</sup>, Tianyu Li<sup>a, b</sup>, Zhiwei Sun<sup>a, b, \*</sup>, Junchao Duan<sup>a, b, \*</sup>

<sup>a</sup> Department of Toxicology and Sanitary Chemistry, School of Public Health, Capital Medical University, Beijing 100069, PR China.

<sup>b</sup> Beijing Key Laboratory of Environmental Toxicology, Capital Medical University, Beijing 100069, PR China.

<sup>c</sup> School of Public Health, Baotou Medical College, Inner Mongolia University of Science & Technology, Baotou 014040, PR China.

### **\*Corresponding authors:**

**Junchao Duan**, Department of Toxicology and Sanitary Chemistry, School of Public Health, Capital Medical University, Beijing 100069, P.R. China. E-mail: [jcduan@ccmu.edu.cn](mailto:jcduan@ccmu.edu.cn)

**Zhiwei Sun**, Department of Toxicology and Sanitary Chemistry, School of Public Health, Capital Medical University, Beijing 100069, P.R. China. E-mail: [zwsun@ccmu.edu.cn](mailto:zwsun@ccmu.edu.cn)

## Supplementary Information

### Characterization of SiNPs

As shown in Figure S1, SiNPs were characterized comprehensively. The transmission electron microscope (TEM) images illustrated that SiNPs were nearly spherical and had relatively favorable dispersion (Figure S1A). The analysis results of Image J software showed that the size distribution of SiNPs was approximately normal, with an average particle size of 51.74 nm (Figure S1B). Table S1 and Figure S1C listed the hydrodynamic sizes, zeta potentials, and polydispersity index (PDI) of SiNPs dispersed in the distilled water, physiological saline, and Dulbecco's Modified Eagle's Medium (DMEM) at different time points (0, 1, 3, 6, 12, 24 h), which revealed that the synthesized SiNPs exhibited the satisfied monodispersity and relatively stability.

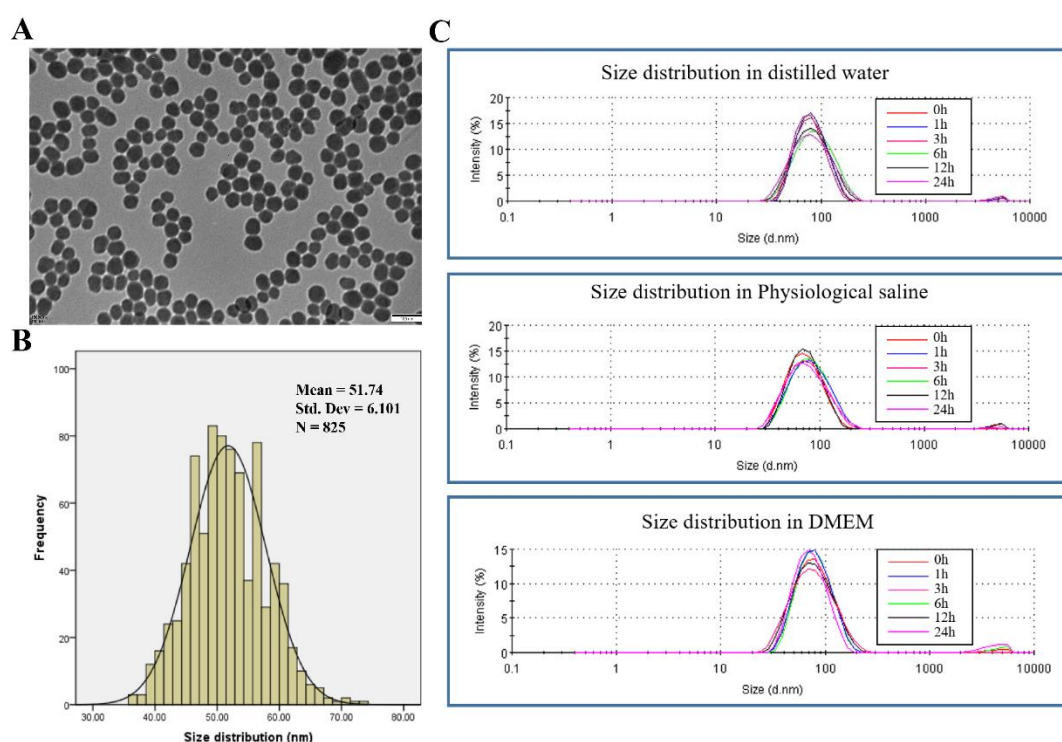

**Figure S1.** Characterization of SiNPs. (A) The TEM images showed that the SiNPs were nearly spherical and had relatively favorable dispersion. (B) The size distribution of SiNPs was approximately normal distribution, with an average particle size of 51.74 nm  $\pm$  6.101. (C) The hydrodynamic sizes of SiNPs in the distilled water, physiological saline and serum-free DMEM at different time points (0, 1, 3, 6, 12, 24 h), which demonstrated that the synthesized SiNPs exhibited the good monodispersity and relatively stability.

Table S1. The hydrodynamic size and zeta potential of the SiNPs in distilled water, physiological saline and DMEM at different time points.

|     | Distilled water         |                     |              | Physiological saline    |                     |              | DMEM                    |                     |              |
|-----|-------------------------|---------------------|--------------|-------------------------|---------------------|--------------|-------------------------|---------------------|--------------|
|     | Hydrodynamic sizes (nm) | Zeta potential (mV) | PDI          | Hydrodynamic sizes (nm) | Zeta potential (mV) | PDI          | Hydrodynamic sizes (nm) | Zeta potential (mV) | PDI          |
| 0h  | 77.70 ± 2.68            | -36.50 ± 0.51       | 0.17 ± 0.01  | 73.36 ± 2.75            | -21.90 ± 0.59       | 0.18 ± 0.004 | 74.65 ± 2.05            | -25.4 ± 1.02        | 0.17 ± 0.02  |
| 1h  | 79.91 ± 0.32            | -37.33 ± 0.61       | 0.15 ± 0.01  | 76.41 ± 0.26            | -22.33 ± 0.27       | 0.16 ± 0.01  | 77.50 ± 0.38            | -23.3 ± 0.99        | 0.18 ± 0.004 |
| 3h  | 78.79 ± 0.89            | -40.03 ± 0.39       | 0.14 ± 0.01  | 74.47 ± 0.61            | -21.80 ± 0.25       | 0.15 ± 0.004 | 73.77 ± 0.50            | -24.70 ± 1.49       | 0.16 ± 0.01  |
| 6h  | 77.09 ± 0.04            | -42.20 ± 0.29       | 0.15 ± 0.01  | 72.04 ± 0.43            | -19.23 ± 0.09       | 0.19 ± 0.01  | 70.18 ± 0.39            | -25.47 ± 0.42       | 0.18 ± 0.01  |
| 12h | 75.84 ± 0.48            | -38.30 ± 1.59       | 0.17 ± 0.002 | 69.07 ± 0.44            | -17.47 ± 1.35       | 0.16 ± 0.004 | 68.02 ± 0.53            | -24.00 ± 1.14       | 0.17 ± 0.002 |
| 24h | 73.56 ± 0.22            | -37.86 ± 0.97       | 0.13 ± 0.02  | 68.32 ± 0.40            | -17.70 ± 0.57       | 0.16 ± 0.002 | 71.66 ± 1.87            | -26.23 ± 0.42       | 0.22 ± 0.02  |

Data are expressed as means ± S.D. from three independent experiments.
